# Supplementary material for: Electric field and strain engineering tuning Rashba spin splitting in quasi-one-dimensional organic–inorganic hybrid perovskites (MV)AI3Cl2 (MV = methylviologen, A = Bi, Sb)
Source: Royal Society of Chemistry journal article supplement (doi:10.1039/d2cp02059a), 2022-01-01
Supplement: d2cp02059a1.pdf [file d2cp02059a1.pdf]

Supplemental Material

**Electric field and strain engineering tuning Rashba spin splitting in quasi-one-dimensional organic-inorganic hybrid perovskites (MV)Al<sub>3</sub>Cl<sub>2</sub> (MV = methylviologen, A = Bi, Sb)**

Chao Wang<sup>1</sup>, Shouyu Wang<sup>2\*</sup>, Winnie. Wong-Ng<sup>3</sup>, Wei Zhou<sup>1</sup>, Zhifeng Xiao<sup>2</sup>, Weifang Liu<sup>1\*</sup>

1. *Tianjin Key Laboratory of Low Dimensional Materials Physics and Preparing Technology, School of Science, Tianjin University, Tianjin 300072, China*

2. *College of Physics and Material Science, Tianjin Normal University, Tianjin 300074, China*

3. *Materials Measurement Science Division, National Institute of Standards and Technology, Gaithersburg, Maryland 20899, USA*

---

\*Corresponding author: [shouyu.wang@yahoo.com](mailto:shouyu.wang@yahoo.com) (S. Y. Wang) [wfliu@tju.edu.cn](mailto:wfliu@tju.edu.cn) (W.F. Liu).

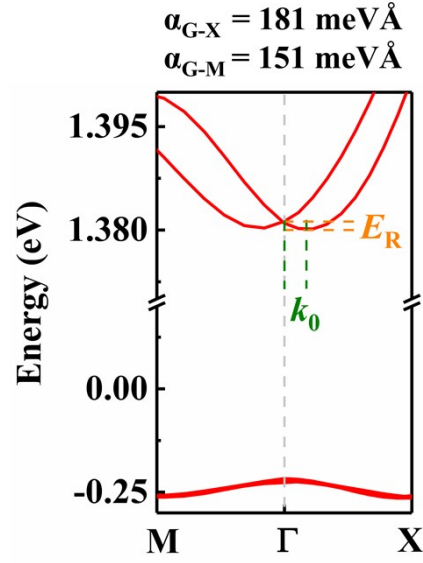

Fig. S1. The band structure of  $k_x$ - $k_y$  plane (MV)BiI<sub>3</sub>Cl<sub>2</sub> with different Rashba constants were calculated using HSE06 hybrid functionals.

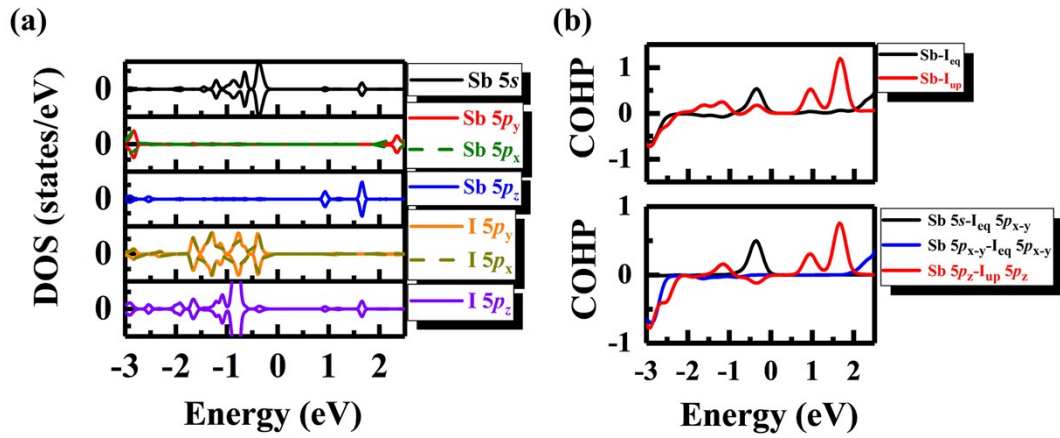

Fig. S2. (a) The projected density of states (DOS) of Sb and I atoms in (MV)SbI<sub>3</sub>Cl<sub>2</sub>. (b) The Crystal Orbital Hamilton Population (COHP) of Sb and its neighboring I atoms.

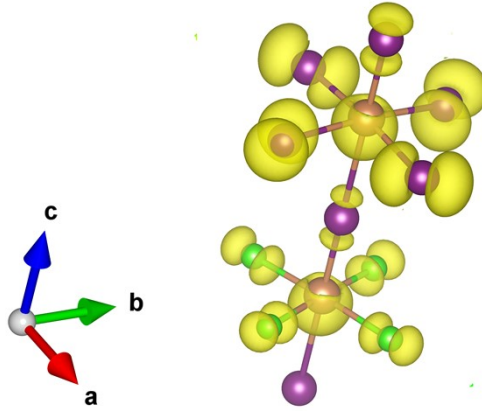

Fig. S3. (a) The partial charge density of the valence band maximum of (MV)SbI<sub>3</sub>Cl<sub>2</sub>.

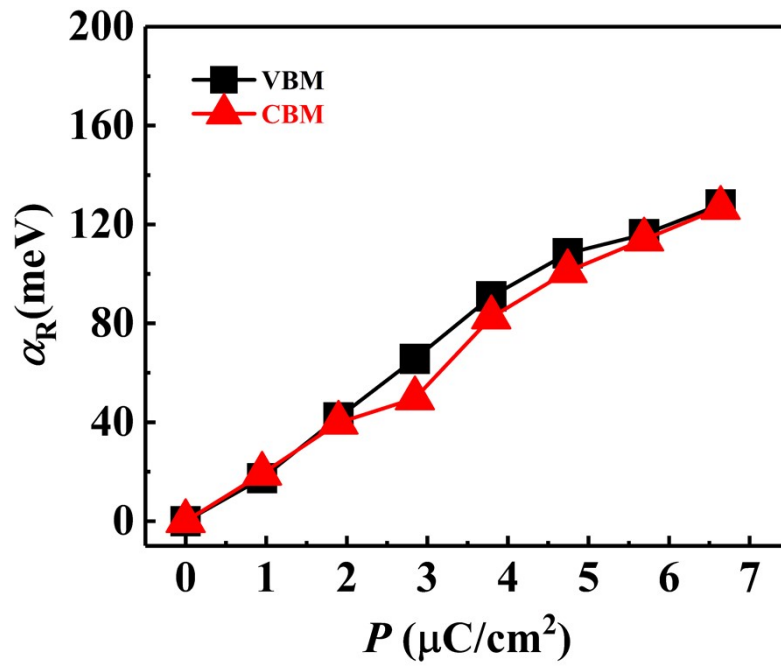

Fig. S4. The Rashba constant of the VBM and the CBM for (MV)SbI<sub>3</sub>Cl<sub>2</sub> with polarization.
